# Supplementary material for: Unique DNA Repair Gene Variations and Potential Associations with the Primary Antibody Deficiency Syndromes IgAD and CVID
Source: PLOS journal article supplement (doi:10.1371/journal.pone.0012260), 2010-08-18
Supplement: S7 (10.1371/journal.pone.0012260.s007) [file journal.pone.0012260.s007]

**Table S7. Target gene resequencing coverage by gene.**

| Gene         | # of targets (exons) | # of 2x Covered Targets | Exons not 2x covered | Target bases | 1x covered bases | 2x covered bases | % 1x covered bases | % 2x covered bases | Territory bases | 1x territory bases covered | 2x territory bases covered | % 1x territory bases covered | % 2x territory bases covered |
|--------------|----------------------|-------------------------|----------------------|--------------|------------------|------------------|--------------------|--------------------|-----------------|----------------------------|----------------------------|------------------------------|------------------------------|
| <i>AID</i>   | 5                    | 5                       | -                    | 2,791        | 2,545            | 2,369            | 91.2%              | 84.9%              | 267,936         | 244,258                    | 228,141                    | 91.2%                        | 85.2%                        |
| <i>APEX1</i> | 7                    | 7                       | -                    | 1,953        | 1,953            | 1,934            | 100.0%             | 99.0%              | 187,488         | 184,553                    | 180,785                    | 98.4%                        | 96.4%                        |
| <i>ERCC1</i> | 12                   | 5                       | 2-4, 7-9, 12         | 1,687        | 1,255            | 921              | 74.4%              | 54.6%              | 161,952         | 120,868                    | 107,383                    | 74.6%                        | 66.3%                        |
| <i>MLH1</i>  | 19                   | 17                      | 10, 12               | 2,522        | 2,434            | 2,263            | 96.5%              | 89.7%              | 242,112         | 230,143                    | 215,311                    | 95.1%                        | 88.9%                        |
| <i>MRE11</i> | 21                   | 19                      | 18, 20               | 5,331        | 5,330            | 5,240            | 100.0%             | 98.3%              | 511,776         | 506,764                    | 496,390                    | 99.0%                        | 97.0%                        |
| <i>MSH2</i>  | 16                   | 12                      | 2, 4, 7, 16          | 3,145        | 2,635            | 2,501            | 83.8%              | 79.5%              | 301,920         | 249,097                    | 237,490                    | 82.5%                        | 78.7%                        |
| <i>NBS1</i>  | 17                   | 16                      | 1                    | 4,671        | 4,398            | 4,325            | 94.2%              | 92.6%              | 448,416         | 415,851                    | 405,753                    | 92.7%                        | 90.5%                        |
| <i>RAD50</i> | 26                   | 23                      | 7, 11, 23            | 5,950        | 5,681            | 5,582            | 95.5%              | 93.8%              | 571,200         | 536,411                    | 522,613                    | 93.9%                        | 91.5%                        |
| <i>RAD52</i> | 18                   | 15                      | 1, 2, 18             | 4,104        | 3,284            | 3,135            | 80.0%              | 76.4%              | 393,984         | 350,473                    | 335,790                    | 89.0%                        | 85.2%                        |
